# Supplementary material for: What do measures of agreement (κ) tell us about quality of exposure assessment? Theoretical analysis and numerical simulation
Source: PubMed Central journal article supplement — BMJ Open. 2013 Dec 3;3(12):e003952. doi: 10.1136/bmjopen-2013-003952 (PMC3855494; doi:10.1136/bmjopen-2013-003952), 2013-12-03
Supplement: bmjopen-2013-003952.draft_revisions.pdf [file bmjopen-2013-003952.draft_revisions.pdf]

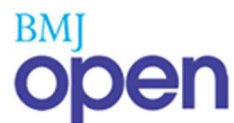

**What do measures of agreement ( $\kappa$ ) tell us about quality of exposure assessment?**

|                                 |                                                                                                                                                                                                                                                       |
|---------------------------------|-------------------------------------------------------------------------------------------------------------------------------------------------------------------------------------------------------------------------------------------------------|
| Journal:                        | <i>BMJ Open</i>                                                                                                                                                                                                                                       |
| Manuscript ID:                  | bmjopen-2013-003952                                                                                                                                                                                                                                   |
| Article Type:                   | Research                                                                                                                                                                                                                                              |
| Date Submitted by the Author:   | 05-Sep-2013                                                                                                                                                                                                                                           |
| Complete List of Authors:       | Burstyn, Igor; Drexel University, Department of Environmental and Occupational Health<br>de Vocht, Frank; The University of Manchester, Occupational and Environmental Health Research<br>Gustafson, Paul; University of British Columbia, Statistics |
| <b>Primary Subject Heading</b>: | Research methods                                                                                                                                                                                                                                      |
| Secondary Subject Heading:      | Epidemiology, Occupational and environmental medicine                                                                                                                                                                                                 |
| Keywords:                       | Epidemiology < TROPICAL MEDICINE, OCCUPATIONAL & INDUSTRIAL MEDICINE, STATISTICS & RESEARCH METHODS                                                                                                                                                   |
|                                 |                                                                                                                                                                                                                                                       |

SCHOLARONE™  
Manuscripts

Peer Review Only

*BMJ Open*

**What do measures of agreement ( $\kappa$ ) tell us about quality of exposure assessment?**

Igor Burstyn<sup>1\*</sup>, Frank de Vocht<sup>2</sup>, Paul Gustafson<sup>3</sup>

1: Department of Environmental and Occupational Health, School of Public Health, Drexel University, Philadelphia, PA, USA

2: Centre for Occupational and Environmental Health, Centre for Epidemiology, Institute of Population Health, Manchester Academic Health Sciences Centre, The University of Manchester, Manchester, UK

3: Department of Statistics, University of British Columbia, Vancouver, Canada.

\*: corresponding authors: Tel: 215.762.2909 | Fax: 215.762.8846 | email: igor.burstyn@drexel.edu

For peer review only

1  
2  
3 **Abstract:**  
4

5 Reliability of binary exposure classification methods is routinely reported in occupational health literature  
6 because it is viewed as an important component of evaluating trustworthiness of the exposure assessment  
7 by experts. Kappa statistics ( $\kappa$ ) are typically employed to assess how well raters or classification systems  
8 agree in a variety of contexts, such as identifying exposed subjects in a population based epidemiological  
9 study of risks due to occupational exposures. However, the question we are really interested in is not so  
10 much the reliability of an exposure-assessment method, although this holds value in itself, but the validity  
11 of the exposure estimates. The validity of binary classifiers can be expressed as a method's sensitivity  
12 (*SN*) and specificity (*SP*), estimated from its agreement with the error-free classifier. We describe a  
13 simulation-based method for deriving information on *SN* and *SP* that can be derived from  $\kappa$  and the  
14 prevalence of exposure, since an analytic solution is not possible without restrictive assumptions. This  
15 work is illustrated in the context of comparison of job-exposure matrices assessing occupational  
16 exposures to polycyclic aromatic hydrocarbons. Our approach allows investigators to evaluate how good  
17 their exposure assessment methods truly are, not just how well they agree with each other, and should  
18 lead to incorporation of information of validity of expert assessment methods into formal uncertainty  
19 analyses in epidemiology.  
20  
21  
22  
23  
24  
25  
26  
27  
28  
29  
30  
31  
32  
33  
34  
35  
36  
37  
38  
39  
40  
41  
42  
43  
44  
45  
46  
47  
48  
49  
50  
51  
52  
53  
54  
55  
56  
57  
58  
59  
60

## Article summary

### (1) Article Focus

- Although evaluation of reliability of exposure classification is routine in occupational epidemiology, little is known about how to use this information to assess validity of exposure classification
- We developed procedure for inferring sensitivity and specificity from evaluation of inter-rater agreement that is suitable for Bayesian analysis of data.

### (2) Key Messages

- Information about reliability of exposure classifiers contains information about validity of exposure estimator.
- Our method is essential step before epidemiological studies that use misclassified binary exposure estimates can correct for exposure misclassification when only reliability of classification is known.

### (3) Strengths and Limitations.

- The main strength of our approach is that it is flexible and easy to implement.
- Our methodology accounts for realistic uncertainties that an epidemiologist faces in evaluating plausible extent of exposure misclassification.
- The main limitation of our work is that does not yet account for correlated errors in exposure estimates that are common on the field and the importance of this limitation remains to be understood.

## Introduction

The reliability of binary exposure classification methods is routinely reported in occupational health literature because it is viewed as important component of evaluating trustworthiness of the exposure assessment. Kappa statistics ( $\kappa$ ) are typically employed to assess how well raters or classification systems agree in a variety of contexts, such as identifying exposed subjects in a population-based epidemiological study of risks due to occupational exposures. Most recently in this journal, Offermans et al. [1] estimated agreement among various methods of assessing exposures in a cohort using various expert-based methods (job-exposure matrices and case-by-case evaluations). The authors reported  $\kappa$  coefficients for these methods that are not unlike those presented previously in a review by Teschke et al. [2], and that seems to suggest that  $\kappa$  values of about 0.6 or worse are a fair summary of what these methods yield in terms of inter-rater agreement in a typical study of occupational exposures. However, the question we are really interested in is not so much the reliability of an exposure-assessment method, although this holds value in itself, but the validity of the exposure estimates.

The validity of binary classifiers can be expressed as a method's sensitivity ( $SN$ ) and specificity ( $SP$ ), estimated from its agreement with the error-free classifier (aka gold standard) [3]. But how does one infer what  $\kappa$  tells us about validity of exposure estimates (i.e.  $SN$  and  $SP$ ) when a true value ("gold standard") is unavailable? Generally, reliability contains information on validity [3] but in the case of  $\kappa$ , its relationship with  $SN$  and  $SP$  is also affected by prevalence of exposure ( $Pr$ ). An analytic solution in this case is not possible without restrictive assumptions about the actual prevalence and relationship between  $SN$  and  $SP$  [4]. Therefore, we developed a simulation-based method for deriving information on  $SN$  and  $SP$  based on  $\kappa$  and the prevalence of exposure. We illustrate this method in the context of a comparison of job-exposure matrices assessing occupational exposures to polycyclic aromatic hydrocarbons (PAH) [1].

## Method

We propose a simulation-based method to calculate values of  $SN$  and  $SP$  that are consistent with the observed  $\kappa$  and  $Pr$ . The relationship among  $\kappa$ ,  $SN$ ,  $SP$  and  $Pr$  can be described mathematically, if we assume two conditionally independent rates with the same validity, by:

$$\kappa = (Pr \times (SP - 1 + SN)^2) \times (Pr - 1) / ((Pr \times SN - SP - Pr + Pr \times SP) \times (Pr \times SN + 1 - SP - Pr + Pr \times SP)) \quad [\text{Eq. 1.}]$$

We assume that exposure classification by experts is better than chance, as expressed by:

$$SN + SP > 1 \quad [\text{Eq.2}]$$

We first define the distributions of the lower ( $\kappa_l$ ) and upper ( $\kappa_h$ ) bounds of  $\kappa$  by using uniform distributions ( $U$ ) as  $\kappa_l \sim U(a_1, a_2)$  and  $\kappa_h \sim U(b_1, b_2)$ . We further define the distribution of  $Pr$  as Beta distribution:  $Pr \sim \text{Beta}(c, d)$ . Information required to specify these distributions with reasonable credibility is available in reports evaluating inter-rater agreements, as in [1]. We can then calculate (multiple) lower bounds of  $SN$  and  $SP$  ( $SN_l$  and  $SP_l$ ) that are consistent with these distributions, following:

$$SN_l = \kappa_l / ((1 - Pr) + \kappa_l \times Pr), \text{ and} \quad [\text{Eq.3}]$$

$$SP_l = \kappa_l / (Pr + \kappa_l \times (1 - Pr)) \quad [\text{Eq.4}]$$

1  
2  
3 The upper theoretical bounds on  $SN$  and  $SP$  are known (i.e. these are 1) and, even though no other  
4 information is available, this enables us to sample plausible  $SN$  and  $SP$  values from the uniform  
5 distribution constrained by the lower bounds ( $SN_l$  and  $SP_l$ , respectively) and the upper bound of 1. Using  
6 Monte Carlo sampling this procedure is repeated multiple times to generate sets of possible ( $SN$ ,  $SP$ )  
7 combinations.  
8  
9

10 The proposed procedure is a hierarchical process that starts with [a] selecting a set of ( $\kappa_l$ ,  $Pr$ ) values from  
11 specified distributions to calculate ( $SN_l$ ,  $SP_l$ ) (Eq. 3 and 4), and is followed by [b] selecting candidate set  
12 ( $SN$ ,  $SP$ ) from values uniformly distributed between lower bounds, ( $SN_l$ ,  $SP_l$ ), and completed by [c]  
13 imposing constraints on the candidate set of ( $SN$ ,  $SP$ ) that are implied by Eq. 1 and 2 (see next paragraph  
14 for details of the last step).  
15  
16

17 By chance, some values of  $Pr$ ,  $SN$  and  $SP$  selected in this way will correspond to values of  $\kappa$ , implied by  
18 by Eq. 1, that lie outside of bounds on  $\kappa$  that we have specified by choosing specific values of  $\kappa_l$  and  
19 upper  $\kappa_h$  from corresponding distributions. Furthermore, some combinations of  $SN$  and  $SP$  will not be  
20 consistent with Eq. 2 (i.e. imply that exposure classification was worse than chance). Consequently, the  
21 candidate sets of values of  $SN$  and  $SP$  that are not in agreement with our starting assumptions are  
22 eliminated from the sample used to estimate distributions of  $SN$  and  $SP$ . The resulting combinations are  
23 consistent with our knowledge of agreement between different exposure assessment methods and foretell  
24 how valid these exposure assessment methods can be expected to be in general.  
25  
26  
27

28 Calculation can be implemented in *R* and is available in *eAppendix* with input values specific to the  
29 illustrative example described below. There is no additional data to share.  
30

31 Because this research did not involve human subjects, ethics clearance was not required.  
32

33 This research was author-initiated and unfunded.  
34  
35

### 36 **Results**

37 We apply our method to information provided in Table 2 in the article by Offermans et al. [1] for PAH  
38 exposure assessment. First, we define the distributions of the lower ( $\kappa_l$ ) and upper ( $\kappa_h$ ) bounds of  $\kappa$  for  
39 PAH by using uniform distributions ( $U$ ) as  $\kappa_l \sim U(0.29, 0.31)$  and  $\kappa_h \sim U(0.59, 0.61)$ . Some degree of  
40 judgments is involved in this but our formulation reflects the observation that in this case  $\kappa$  for PAHs lies  
41 between 0.3 and 0.6. We further define the distribution of  $Pr$  (mode of 5%, with 95% certainty that  $Pr$   
42 does not exceed 10%) as  $Pr \sim \text{Beta}(6.2, 99.7)[5]$ . The results of the rest of the calculations are summarized  
43 in the Figure, derived from 10,000 Monte Carlo samples for candidate values of  $SN$  and  $SP$  (step [b]  
44 above). They reveal that the mean  $SN$  for this example is about 0.78 (standard deviation (sd) 0.15) and  
45 mean  $SP$  is about 0.96 (sd 0.03).  
46  
47  
48  
49

### 50 **Discussion**

51 Our approach allows investigators to evaluate how good their exposure assessment methods truly are, not  
52 just how well they agree with each other, and should lead to incorporation of information of validity of  
53 expert assessment methods into formal uncertainty analyses in epidemiology (e.g. [6]). Specifically, once  
54 we can represent knowledge about  $SN$  and  $SP$  by a joint distribution, we can use a number of existing  
55 techniques to evaluate impact of exposure misclassification on epidemiologic results and to correct such  
56  
57  
58  
59  
60

1  
2  
3 results for known imperfections in exposure classification. Till now, knowledge of  $\kappa$  and exposure  
4 prevalence did not enable such analyses. It is noteworthy that Bayesian analyses that appraised *SN* and  
5 *SP* of another JEM, produced very similar appraisal for *SP* and lower value for average *SN* with a  
6 similarly wide distribution [7, 8]. This perhaps points to commonality of quality of expert assessment  
7 methods used in occupational epidemiology. It is important to note that simple comparison of measures  
8 of agreement across studies and instruments is not helpful because values of  $\kappa$  depend on the prevalence  
9 of exposure, which may differ between applications even for the same *SN* and *SP*. Our method has a  
10 distinct advantage for such comparisons and assessment of validity. With knowledge about validity, even  
11 if it is uncertain, we can begin the work on incorporating this knowledge in epidemiological analyses [9].  
12  
13  
14  
15  
16  
17  
18  
19  
20  
21  
22  
23  
24  
25  
26  
27  
28  
29  
30  
31  
32  
33  
34  
35  
36  
37  
38  
39  
40  
41  
42  
43  
44  
45  
46  
47  
48  
49  
50  
51  
52  
53  
54  
55  
56  
57  
58  
59  
60

1  
2  
3 **Figure: Plausible pairs of SN and SP values for PAH exposure assessment methods evaluated in [1];**  
4 **hashed lined denote means**  
5  
6  
7  
8  
9

10  
11 **Funding**

12 None

13  
14  
15 **Competing Interests**

16 None

17  
18  
19 **Contributorship**

20  
21 All authors equally contributed to writing the manuscript. IB and PG jointly developed the algorithm.  
22 Theoretical derivations were performed by PG. Simulations were conducted by IB and verified by PG  
23 and FdV.  
24  
25

26 **Data sharing**

27 No additional data available.  
28  
29  
30  
31  
32  
33  
34  
35  
36  
37  
38  
39  
40  
41  
42  
43  
44  
45  
46  
47  
48  
49  
50  
51  
52  
53  
54  
55  
56  
57  
58  
59  
60



## Reference List

- 1 Offermans NS, Vermeulen R, Burdorf A, *et al.* Comparison of expert and job-exposure matrix-based retrospective exposure assessment of occupational carcinogens in The Netherlands Cohort Study. *Occup Environ Med* 2012;**69** (10):745-51.
- 2 Teschke K, Olshan AF, Daniels JL, *et al.* Occupational exposure assessment in case-control studies: opportunities for improvement. *Occup Environ Med* 2002;**59** (9):575-93.
- 3 White E, Armstrong BK, Saracci R. *Principles of exposure measurement in epidemiology: collecting, evaluating and improving measures of disease risk factor.* Oxford University Press 2008.
- 4 Feuerman M, Miller AR. Relationships between statistical measures of agreement: sensitivity, specificity and kappa. *J Eval Clin Pract* 2008;**14** (5):930-3.
- 5 Chun-Lung Su. *Bayesian Epidemiologic Screening Techniques.* 2013.
- 6 MacLehose RF, Gustafson P. Is probabilistic bias analysis approximately Bayesian? *Epidemiology* 2012;**23** (1):151-8.
- 7 Liu J, Gustafson P, Cherry N, *et al.* Bayesian analysis of a matched case-control study with expert prior information on both the misclassification of exposure and the exposure-disease association. *Stat Med* 2009;**28** (27):3411-23.
- 8 Beach J, Burstyn I, Cherry N. Estimating the extent and distribution of new-onset adult asthma in British Columbia using frequentist and Bayesian approaches. *Ann Occup Hyg* 2012;**56** (6):719-27.
- 9 Gustafson P. *Measurement Error and Misclassification in Statistics and Epidemiology.* Chapman & Hall/CRC Press 2004.

1  
2  
3  
4  
5  
6  
7  
8  
9  
10  
11  
12  
13  
14  
15  
16  
17  
18  
19  
20  
21  
22  
23  
24  
25  
26  
27  
28  
29  
30  
31  
32  
33  
34  
35  
36  
37  
38  
39  
40  
41  
42  
43  
44  
45  
46  
47  
48  
49  
50  
51  
52  
53  
54  
55  
56  
57  
58  
59  
60

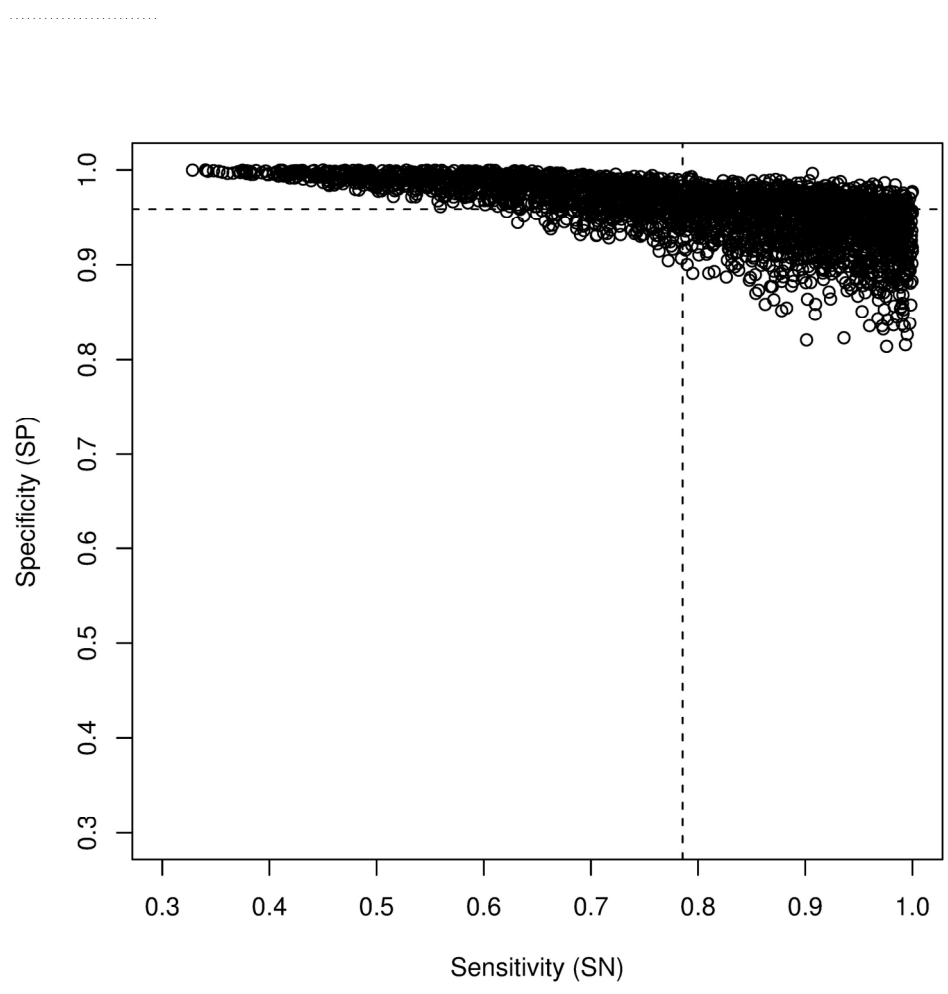

Plausible pairs of SN and SP values for PAH exposure assessment methods evaluated in [1]; hashed lined denote means  
165x165mm (300 x 300 DPI)

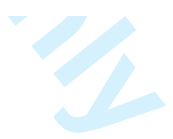

```

1
2
3 #####
4 #APPENDIX: What do measures of agreement ( $\kappa$ ) tell us about quality of exposure assessment?
5 #script that is to be implemented in R software
6 #####
7 #START
8
9
10 ##INPUTS
11 k<-10000 #size of simulation
12 #informed by DATA from PAH from http://oem.bmj.com/content/69/10/745.full
13 KP.LO<-runif(k, 0.29, 0.31) #UNIFORM DISTN of lower bound on kappa
14 KP.HI<-runif(k, 0.59, 0.61) # UNIFORM DISTN of high bound of kappa
15 PREV.CLBRT<-rbeta(k, 6.1946, 99.6983) #BETA distribution of exposure prevalence
16
17
18 ##CALCULATIONS
19 #lower bound on SN and SP
20 SN.LO<-KP.LO/((1-PREV.CLBRT) + KP.LO*PREV.CLBRT)
21 SP.LO<-KP.LO/(PREV.CLBRT + KP.LO*(1-PREV.CLBRT))
22
23
24 #unconstrained priors on SN and SP
25 SN<-runif(k, SN.LO,1)
26 SP<-runif(k, SP.LO,1)
27
28
29 #apply constraints
30 p<-PREV.CLBRT
31 kappa.naive<-(p*(SP-1+SN)^2)*(p-1)/((p*SN-SP-p+p*SP)*(p*SN+1-SP-p+p*SP))
32 lo<-rep(0, k)
33 hi<-rep(0, k)
34 for (i in 1:k) {if(kappa.naive[i] < KP.LO[i] ) lo[i] <- 1}
35 sum(lo)
36 for (i in 1:k) {if(kappa.naive[i] > KP.HI[i] ) hi[i] <- 1}
37 sum(hi)
38 random<-rep(0, k)
39 add<-SN+SP
40 for (i in 1:k) {if(add[i]<1) random[i] <- 1}
41 sum(random)
42
43
44 #prior after constraints
45 pq1<-cbind(SN, SP, lo, hi, random)
46 pq2<-data.frame(pq1)
47 prior_ <- subset(pq2, lo == 0 & hi == 0 & random==0)
48
49
50 ##PRESENT RESULTS IN A FIGURE
51 plot(prior_ $SN, prior_ $SP, xlab="Sensitivity (SN)", ylab="Specificity (SP)", xlim=c(0.3, 1), ylim=c(0.3, 1))
52 length(prior_ $SN)
53 abline(v=mean(prior_ $SN), lty=2)
54 abline(h=mean(prior_ $SP), lty=2)
55
56
57 # END
58
59
60

```

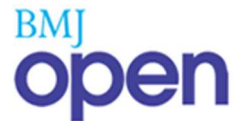

**What do measures of agreement ( $\kappa$ ) tell us about quality of exposure assessment? Theoretical analysis and numerical simulation.**

|                                 |                                                                                                                                                                                                                                                       |
|---------------------------------|-------------------------------------------------------------------------------------------------------------------------------------------------------------------------------------------------------------------------------------------------------|
| Journal:                        | <i>BMJ Open</i>                                                                                                                                                                                                                                       |
| Manuscript ID:                  | bmjopen-2013-003952.R1                                                                                                                                                                                                                                |
| Article Type:                   | Research                                                                                                                                                                                                                                              |
| Date Submitted by the Author:   | 25-Oct-2013                                                                                                                                                                                                                                           |
| Complete List of Authors:       | Burstyn, Igor; Drexel University, Department of Environmental and Occupational Health<br>de Vocht, Frank; The University of Manchester, Occupational and Environmental Health Research<br>Gustafson, Paul; University of British Columbia, Statistics |
| <b>Primary Subject Heading</b>: | Research methods                                                                                                                                                                                                                                      |
| Secondary Subject Heading:      | Epidemiology, Occupational and environmental medicine                                                                                                                                                                                                 |
| Keywords:                       | Epidemiology < TROPICAL MEDICINE, OCCUPATIONAL & INDUSTRIAL MEDICINE, STATISTICS & RESEARCH METHODS                                                                                                                                                   |
|                                 |                                                                                                                                                                                                                                                       |

SCHOLARONE™  
Manuscripts

1  
2  
3 *BMJ Open*  
4

5 **What do measures of agreement ( $\kappa$ ) tell us about quality of exposure assessment? Theoretical**  
6 **analysis and numerical simulation.**  
7

8 Igor Burstyn<sup>1\*</sup>, Frank de Vocht<sup>2</sup>, Paul Gustafson<sup>3</sup>  
9

10  
11 1: Department of Environmental and Occupational Health, School of Public Health, Drexel University,  
12 Philadelphia, PA, USA  
13

14 2: Centre for Occupational and Environmental Health, Centre for Epidemiology, Institute of Population Health,  
15 Manchester Academic Health Sciences Centre, The University of Manchester, Manchester, UK  
16

17 3: Department of Statistics, University of British Columbia, Vancouver, Canada.  
18

19 \*: corresponding authors: Tel: 215.762.2909 | Fax: 215.762.8846 | email: igor.burstyn@drexel.edu  
20  
21  
22  
23  
24  
25  
26  
27  
28  
29  
30  
31  
32  
33  
34  
35  
36  
37  
38  
39  
40  
41  
42  
43  
44  
45  
46  
47  
48  
49  
50  
51  
52  
53  
54  
55  
56  
57  
58  
59  
60

1  
2  
3 ***Abstract:***  
4

5 Background: Reliability of binary exposure classification methods is routinely reported in occupational  
6 health literature because it is viewed as an important component of evaluating trustworthiness of the  
7 exposure assessment by experts. Kappa statistics ( $\kappa$ ) are typically employed to assess how well raters or  
8 classification systems agree in a variety of contexts, such as identifying exposed subjects in a population  
9 based epidemiological study of risks due to occupational exposures. However, the question we are really  
10 interested in is not so much the reliability of an exposure-assessment method, although this holds value in  
11 itself, but the validity of the exposure estimates. The validity of binary classifiers can be expressed as a  
12 method's sensitivity (*SN*) and specificity (*SP*), estimated from its agreement with the error-free classifier.  
13  
14  
15

16 Methods and results: We describe a simulation-based method for deriving information on *SN* and *SP* that  
17 can be derived from  $\kappa$  and the prevalence of exposure, since an analytic solution is not possible without  
18 restrictive assumptions. This work is illustrated in the context of comparison of job-exposure matrices  
19 assessing occupational exposures to polycyclic aromatic hydrocarbons.  
20  
21

22 Discussion: Our approach allows investigators to evaluate how good their exposure assessment methods  
23 truly are, not just how well they agree with each other, and should lead to incorporation of information of  
24 validity of expert assessment methods into formal uncertainty analyses in epidemiology.  
25  
26  
27  
28  
29  
30  
31  
32  
33  
34  
35  
36  
37  
38  
39  
40  
41  
42  
43  
44  
45  
46  
47  
48  
49  
50  
51  
52  
53  
54  
55  
56  
57  
58  
59  
60

## Article summary

### (1) Article Focus

- Although evaluation of reliability of exposure classification is routine in occupational epidemiology, little is known about how to use this information to assess validity of exposure classification.
- We developed procedure for inferring sensitivity and specificity from evaluation of inter-rater agreement that is suitable for Bayesian analysis of data.

### (2) Key Messages

- Information about reliability of exposure classifiers contains information about validity of exposure estimator.
- Our method is essential step before epidemiological studies that use misclassified binary exposure estimates can correct for exposure misclassification when only reliability of classification is known.

### (3) Strengths and Limitations.

- The main strength of our approach is that it is flexible and easy to implement.
- Our methodology accounts for realistic uncertainties that an epidemiologist faces in evaluating plausible extent of exposure misclassification.
- The main limitation of our work is that does not yet account for correlated errors in exposure estimates that are common in the field and the importance of this limitation remains to be understood.

## Introduction

The reliability of binary exposure classification methods is routinely reported in occupational health literature because it is viewed as an important component of evaluating trustworthiness of the exposure assessment. Kappa statistics ( $\kappa$ ) are typically employed to assess how well raters or classification systems agree in a variety of contexts, such as identifying exposed subjects in a population-based epidemiological study of risks due to occupational exposures. Most recently, Offermans et al. [1] estimated agreement among various methods of assessing exposures in a cohort using various expert-based methods (job-exposure matrices and case-by-case evaluations). The authors reported  $\kappa$  coefficients for these methods that are not unlike those presented previously in a review by Teschke et al. [2], and that seems to suggest that  $\kappa$  values of about 0.6 or worse are a fair summary of what these methods yield in terms of inter-rater agreement in a typical study of occupational exposures. However, the question we are really interested in is not so much the reliability of an exposure-assessment method, although this holds value in itself, but the validity of the exposure estimates.

The validity of binary classifiers can be expressed as a method's sensitivity ( $SN$ ) and specificity ( $SP$ ), estimated from its agreement with the error-free classifier (also known as "gold standard") [3]. But how does one infer what  $\kappa$  tells us about the validity of exposure estimates (i.e.  $SN$  and  $SP$ ) when a true value (gold standard) is unavailable? Generally, reliability contains information on validity [3] but in the case of  $\kappa$ , its relationship with  $SN$  and  $SP$  is also affected by prevalence of exposure ( $Pr$ ). An analytic solution in this case is not possible without restrictive assumptions about the actual prevalence and relationship between  $SN$  and  $SP$  [4]. Therefore, we developed a simulation-based method for deriving information on  $SN$  and  $SP$  based on  $\kappa$  and the prevalence of exposure. We illustrate this method in the context of a comparison of job-exposure matrices assessing occupational exposures to polycyclic aromatic hydrocarbons (PAH) [1].

## Method

We propose a simulation-based method to calculate values of  $SN$  and  $SP$  that are consistent with the observed  $\kappa$  and  $Pr$ . The relationship among  $\kappa$ ,  $SN$ ,  $SP$  and  $Pr$  can be described mathematically, if we assume two conditionally independent raters with the same validity, by:

$$\kappa = (Pr \times (SP - 1 + SN)^2) \times (Pr - 1) / ((Pr \times SN - SP - Pr + Pr \times SP) \times (Pr \times SN + 1 - SP - Pr + Pr \times SP)) \quad [\text{Eq. 1.}]$$

We assume that exposure classification by experts is better than chance, as expressed by:

$$SN + SP > 1 \quad [\text{Eq.2}]$$

We first define the distributions of the lower ( $\kappa_l$ ) and upper ( $\kappa_h$ ) bounds of  $\kappa$  by using uniform distributions ( $U$ ) as  $\kappa_l \sim U(a_1, a_2)$  and  $\kappa_h \sim U(b_1, b_2)$ . We further define the distribution of  $Pr$  as Beta distribution:  $Pr \sim \text{Beta}(c, d)$ . Information required to specify these distributions with reasonable credibility is available in reports evaluating inter-rater agreements, as in [1]. We can then calculate (multiple) lower bounds of  $SN$  and  $SP$  ( $SN_l$  and  $SP_l$ ) that are consistent with these distributions, following:

$$SN_l = \kappa_l / ((1 - Pr) + \kappa_l \times Pr), \text{ and} \quad [\text{Eq.3}]$$

$$SP_l = \kappa_l / (Pr + \kappa_l \times (1 - Pr)) \quad [\text{Eq.4}]$$



1  
2  
3 The upper theoretical bounds on  $SN$  and  $SP$  are known (i.e. these are 1) and, even though no other  
4 information is available, this enables us to sample plausible  $SN$  and  $SP$  values from the uniform  
5 distribution constrained by the lower bounds ( $SN_l$  and  $SP_l$ , respectively) and the upper bound of 1. Using  
6 Monte Carlo sampling this procedure is repeated multiple times to generate sets of possible ( $SN$ ,  $SP$ )  
7 combinations.  
8  
9

10 The proposed procedure is a hierarchical process that starts with [a] selecting a set of ( $\kappa_l$ ,  $Pr$ ) values from  
11 specified distributions to calculate ( $SN_l$ ,  $SP_l$ ) (Eq. 3 and 4), and is followed by [b] selecting candidate set  
12 ( $SN$ ,  $SP$ ) from values uniformly distributed between lower bounds, ( $SN_l$ ,  $SP_l$ ), and upper theoretical  
13 maximum of 1, and completed by [c] imposing constraints on the candidate set of ( $SN$ ,  $SP$ ) that are  
14 implied by Eq. 1 and 2 (see next paragraph for details of the last step). The purpose of step [a] in the  
15 procedure is to calculate lower bounds on sensitivity and specificity. The purpose of step [b] is to sample  
16 candidate values of sensitivity and specificity that lie between their respective theoretical lower and upper  
17 boundaries. The purpose of step [c] is to limit the sets of values of sensitivity and specificity selected in  
18 step [b] to only those that, first, are congruent with the theoretical model that relates validity to reliability  
19 (Eq. 1), and, second, satisfy the assumption that classification of exposure is better than random (Eq. 2).  
20  
21  
22

23 By chance, some values of  $Pr$ ,  $SN$  and  $SP$  selected in this way will correspond to values of  $\kappa$ , implied by  
24 by Eq. 1, that lie outside of bounds on  $\kappa$  that we have specified by choosing specific values of  $\kappa_l$  and  
25 upper  $\kappa_h$  from corresponding distributions. Furthermore, some combinations of  $SN$  and  $SP$  will not be  
26 consistent with Eq. 2 (i.e. imply that exposure classification was worse than chance). Consequently, the  
27 candidate sets of values of  $SN$  and  $SP$  that are not in agreement with our starting assumptions are  
28 eliminated from the sample used to estimate distributions of  $SN$  and  $SP$ . The resulting combinations are  
29 consistent with our knowledge of agreement between different exposure assessment methods and foretell  
30 how valid these exposure assessment methods can be expected to be in general.  
31  
32  
33

34 Calculation can be implemented in *R* and is available in *eAppendix* with input values specific to the  
35 illustrative example described below. There is no additional data to share.  
36

37 Because this research did not involve human subjects, ethics clearance was not required.  
38

39 This research was author-initiated and unfunded.  
40  
41

## 42 **Results**

43 We apply our method to information provided in Table 2 in the article by Offermans et al. [1] for PAH  
44 exposure assessment. First, we define the distributions of the lower ( $\kappa_l$ ) and upper ( $\kappa_h$ ) bounds of  $\kappa$  for  
45 PAH by using uniform distributions ( $U$ ) as  $\kappa_l \sim U(0.29, 0.31)$  and  $\kappa_h \sim U(0.59, 0.61)$ . Some degree of  
46 judgments is involved in this but our formulation reflects the observation that in this case  $\kappa$  for PAHs lies  
47 between 0.3 and 0.6. We further define the distribution of  $Pr$  (mode of 5%, with 95% certainty that  $Pr$   
48 does not exceed 10%) as  $Pr \sim \text{Beta}(6.2, 99.7)[5]$ . The results of the rest of the calculations are summarized  
49 in the Figure, derived from 10,000 Monte Carlo samples for candidate values of  $SN$  and  $SP$  (step [b]  
50 above). They reveal that the mean  $SN$  for this example is about 0.78 (standard deviation (sd) 0.15) and  
51 mean  $SP$  is about 0.96 (sd 0.03).  
52  
53  
54  
55

## 56 **Discussion**

57  
58  
59  
60

1  
2  
3 Our approach allows investigators to evaluate how good their exposure assessment methods truly are, not  
4 just how well they agree with each other, and should lead to incorporation of information of validity of  
5 expert assessment methods into formal uncertainty analyses in epidemiology (e.g. [6]). Specifically, once  
6 we can represent knowledge about *SN* and *SP* by a joint distribution, we can use a number of existing  
7 techniques to evaluate impact of exposure misclassification on epidemiologic results and to correct such  
8 results for known imperfections in exposure classification. Till now, knowledge of  $\kappa$  and exposure  
9 prevalence did not enable such analyses. It is noteworthy that Bayesian analyses that appraised *SN* and  
10 *SP* of another job-exposure matrix produced very similar appraisal for *SP* and lower value for average *SN*  
11 with a similarly wide distribution [7, 8]. This perhaps points to commonality of quality of expert  
12 assessment methods used in occupational epidemiology. It is important to note that simple comparison of  
13 measures of agreement across studies and instruments is not helpful because values of  $\kappa$  depend on the  
14 prevalence of exposure, which may differ between applications even for the same *SN* and *SP*. Our  
15 method has a distinct advantage for such comparisons and assessment of validity. With knowledge about  
16 validity, even if it is uncertain, we can begin the work on incorporating this knowledge into routine  
17 epidemiological analyses [9].  
18  
19  
20  
21  
22  
23  
24  
25  
26  
27  
28  
29  
30  
31  
32  
33  
34  
35  
36  
37  
38  
39  
40  
41  
42  
43  
44  
45  
46  
47  
48  
49  
50  
51  
52  
53  
54  
55  
56  
57  
58  
59  
60

**Figure legend:**

Figure : Plausible pairs of SN and SP values for exposure assessment methods for polycyclic aromatic hydrocarbons evaluated in [1]; hashed lined denote means

**Data sharing**

No additional data available.

**Funding**

None

**Competing Interests**

None

**Contributorship**

All authors equally contributed to writing the manuscript. IB and PG jointly developed the algorithm. Theoretical derivations were performed by PG. Simulations were conducted by IB and verified by PG and FdV.

## Reference List

- 1 Offermans NS, Vermeulen R, Burdorf A, *et al.* Comparison of expert and job-exposure matrix-based retrospective exposure assessment of occupational carcinogens in The Netherlands Cohort Study. *Occup Environ Med* 2012;**69** (10):745-51.
- 2 Teschke K, Olshan AF, Daniels JL, *et al.* Occupational exposure assessment in case-control studies: opportunities for improvement. *Occup Environ Med* 2002;**59** (9):575-93.
- 3 White E, Armstrong BK, Saracci R. *Principles of exposure measurement in epidemiology: collecting, evaluating and improving measures of disease risk factor.* Oxford University Press 2008.
- 4 Feuerman M, Miller AR. Relationships between statistical measures of agreement: sensitivity, specificity and kappa. *J Eval Clin Pract* 2008;**14** (5):930-3.
- 5 Chun-Lung Su. *Bayesian Epidemiologic Screening Techniques.* 2013.
- 6 MacLehose RF, Gustafson P. Is probabilistic bias analysis approximately Bayesian? *Epidemiology* 2012;**23** (1):151-8.
- 7 Liu J, Gustafson P, Cherry N, *et al.* Bayesian analysis of a matched case-control study with expert prior information on both the misclassification of exposure and the exposure-disease association. *Stat Med* 2009;**28** (27):3411-23.
- 8 Beach J, Burstyn I, Cherry N. Estimating the extent and distribution of new-onset adult asthma in British Columbia using frequentist and Bayesian approaches. *Ann Occup Hyg* 2012;**56** (6):719-27.
- 9 Gustafson P. *Measurement Error and Misclassification in Statistics and Epidemiology.* Chapman & Hall/CRC Press 2004.

1  
2  
3  
4  
5  
6  
7  
8  
9  
10  
11  
12  
13  
14  
15  
16  
17  
18  
19  
20  
21  
22  
23  
24  
25  
26  
27  
28  
29  
30  
31  
32  
33  
34  
35  
36  
37  
38  
39  
40  
41  
42  
43  
44  
45  
46  
47  
48  
49  
50  
51  
52  
53  
54  
55  
56  
57  
58  
59  
60

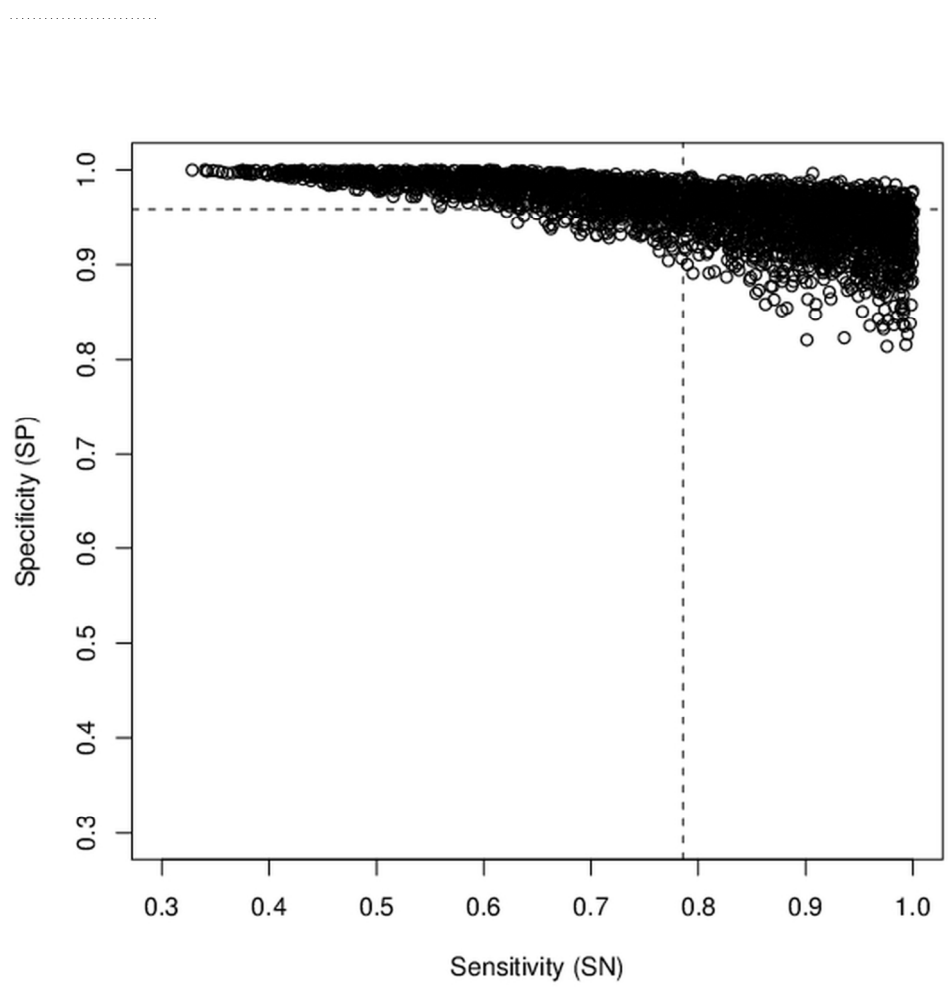

Plausible pairs of SN and SP values for exposure assessment methods for polycyclic aromatic hydrocarbons evaluated in [1]; hashed lined denote means  
90x90mm (300 x 300 DPI)

```

1
2
3 #####
4 #APPENDIX: What do measures of agreement ( $\kappa$ ) tell us about quality of exposure assessment?
5 #script that is to be implemented in R software
6 #####
7 #START
8
9
10 ##INPUTS
11 k<-10000 #size of simulation
12 #informed by DATA from PAH from http://oem.bmj.com/content/69/10/745.full
13 KP.LO<-runif(k, 0.29, 0.31) #UNIFORM DISTN of lower bound on kappa
14 KP.HI<-runif(k, 0.59, 0.61) # UNIFORM DISTN of high bound of kappa
15 PREV.CLBRT<-rbeta(k, 6.1946, 99.6983) #BETA distribution of exposure prevalence
16
17
18 ##CALCULATIONS
19 #lower bound on SN and SP
20 SN.LO<-KP.LO/((1-PREV.CLBRT) + KP.LO*PREV.CLBRT)
21 SP.LO<-KP.LO/(PREV.CLBRT + KP.LO*(1-PREV.CLBRT))
22
23
24 #unconstrained priors on SN and SP
25 SN<-runif(k, SN.LO,1)
26 SP<-runif(k, SP.LO,1)
27
28
29 #apply constraints
30 p<-PREV.CLBRT
31 kappa.naive<-(p*(SP-1+SN)^2)*(p-1)/((p*SN-SP-p+p*SP)*(p*SN+1-SP-p+p*SP))
32 lo<-rep(0, k)
33 hi<-rep(0, k)
34 for (i in 1:k) {if(kappa.naive[i] < KP.LO[i] ) lo[i] <- 1}
35 sum(lo)
36 for (i in 1:k) {if(kappa.naive[i] > KP.HI[i] ) hi[i] <- 1}
37 sum(hi)
38 random<-rep(0, k)
39 add<-SN+SP
40 for (i in 1:k) {if(add[i]<1) random[i] <- 1}
41 sum(random)
42
43
44
45 #prior after constraints
46 pq1<-cbind(SN, SP, lo, hi, random)
47 pq2<-data.frame(pq1)
48 prior_ <- subset(pq2, lo == 0 & hi == 0 & random==0)
49
50
51 ##PRESENT RESULTS IN A FIGURE
52 plot(prior_ $SN, prior_ $SP, xlab="Sensitivity (SN)", ylab="Specificity (SP)", xlim=c(0.3, 1), ylim=c(0.3, 1))
53 length(prior_ $SN)
54 abline(v=mean(prior_ $SN), lty=2)
55 abline(h=mean(prior_ $SP), lty=2)
56
57
58 # END
59
60

```

1  
2  
3 *BMJ Open*  
4

5 **What do measures of agreement ( $\kappa$ ) tell us about quality of exposure assessment? Theoretical**  
6 **analysis and numerical simulation.**  
7

8 Igor Burstyn<sup>1\*</sup>, Frank de Vocht<sup>2</sup>, Paul Gustafson<sup>3</sup>  
9

10  
11 1: Department of Environmental and Occupational Health, School of Public Health, Drexel University,  
12 Philadelphia, PA, USA

13  
14 2: Centre for Occupational and Environmental Health, Centre for Epidemiology, Institute of Population Health,  
15 Manchester Academic Health Sciences Centre, The University of Manchester, Manchester, UK

16  
17 3: Department of Statistics, University of British Columbia, Vancouver, Canada.  
18

19 \*: corresponding authors: Tel: 215.762.2909 | Fax: 215.762.8846 | email: igor.burstyn@drexel.edu  
20  
21  
22  
23  
24  
25  
26  
27  
28  
29  
30  
31  
32  
33  
34  
35  
36  
37  
38  
39  
40  
41  
42  
43  
44  
45  
46  
47  
48  
49  
50  
51  
52  
53  
54  
55  
56  
57  
58  
59  
60

1  
2  
3 **Abstract:**  
4

5 | **Background:** Reliability of binary exposure classification methods is routinely reported in occupational  
6 health literature because it is viewed as an important component of evaluating trustworthiness of the  
7 exposure assessment by experts. Kappa statistics ( $\kappa$ ) are typically employed to assess how well raters or  
8 classification systems agree in a variety of contexts, such as identifying exposed subjects in a population  
9 based epidemiological study of risks due to occupational exposures. However, the question we are really  
10 interested in is not so much the reliability of an exposure-assessment method, although this holds value in  
11 itself, but the validity of the exposure estimates. The validity of binary classifiers can be expressed as a  
12 method's sensitivity (*SN*) and specificity (*SP*), estimated from its agreement with the error-free classifier.  
13

14 | **Methods and results:** We describe a simulation-based method for deriving information on *SN* and *SP* that  
15 can be derived from  $\kappa$  and the prevalence of exposure, since an analytic solution is not possible without  
16 restrictive assumptions. This work is illustrated in the context of comparison of job-exposure matrices  
17 assessing occupational exposures to polycyclic aromatic hydrocarbons.  
18

19 | **Discussion:** Our approach allows investigators to evaluate how good their exposure assessment methods  
20 truly are, not just how well they agree with each other, and should lead to incorporation of information of  
21 validity of expert assessment methods into formal uncertainty analyses in epidemiology.  
22  
23  
24  
25  
26  
27  
28  
29  
30  
31  
32  
33  
34  
35  
36  
37  
38  
39  
40  
41  
42  
43  
44  
45  
46  
47  
48  
49  
50  
51  
52  
53  
54  
55  
56  
57  
58  
59  
60



## Article summary

### (1) Article Focus

- Although evaluation of reliability of exposure classification is routine in occupational epidemiology, little is known about how to use this information to assess validity of exposure classification.
- We developed procedure for inferring sensitivity and specificity from evaluation of inter-rater agreement that is suitable for Bayesian analysis of data.

### (2) Key Messages

- Information about reliability of exposure classifiers contains information about validity of exposure estimator.
- Our method is essential step before epidemiological studies that use misclassified binary exposure estimates can correct for exposure misclassification when only reliability of classification is known.

### (3) Strengths and Limitations.

- The main strength of our approach is that it is flexible and easy to implement.
- Our methodology accounts for realistic uncertainties that an epidemiologist faces in evaluating plausible extent of exposure misclassification.
- The main limitation of our work is that does not yet account for correlated errors in exposure estimates that are common [on-in](#) the field and the importance of this limitation remains to be understood.

## Introduction

The reliability of binary exposure classification methods is routinely reported in occupational health literature because it is viewed as [an](#) important component of evaluating trustworthiness of the exposure assessment. Kappa statistics ( $\kappa$ ) are typically employed to assess how well raters or classification systems agree in a variety of contexts, such as identifying exposed subjects in a population-based epidemiological study of risks due to occupational exposures. Most recently [in this journal](#), Offermans et al. [1] estimated agreement among various methods of assessing exposures in a cohort using various expert-based methods (job-exposure matrices and case-by-case evaluations). The authors reported  $\kappa$  coefficients for these methods that are not unlike those presented previously in a review by Teschke et al. [2], and that seems to suggest that  $\kappa$  values of about 0.6 or worse are a fair summary of what these methods yield in terms of inter-rater agreement in a typical study of occupational exposures. However, the question we are really interested in is not so much the reliability of an exposure-assessment method, although this holds value in itself, but the validity of the exposure estimates.

The validity of binary classifiers can be expressed as a method's sensitivity ( $SN$ ) and specificity ( $SP$ ), estimated from its agreement with the error-free classifier ([aka also known as "gold standard"](#)) [3]. But how does one infer what  $\kappa$  tells us about [the](#) validity of exposure estimates (i.e.  $SN$  and  $SP$ ) when a true value (["gold standard"](#)) is unavailable? Generally, reliability contains information on validity [3] but in the case of  $\kappa$ , its relationship with  $SN$  and  $SP$  is also affected by prevalence of exposure ( $Pr$ ). An analytic solution in this case is not possible without restrictive assumptions about the actual prevalence and relationship between  $SN$  and  $SP$ [4]. Therefore, we developed a simulation-based method for deriving information on  $SN$  and  $SP$  based on  $\kappa$  and the prevalence of exposure. We illustrate this method in the context of a comparison of job-exposure matrices assessing occupational exposures to polycyclic aromatic hydrocarbons (PAH) [1].

## Method

We propose a simulation-based method to calculate values of  $SN$  and  $SP$  that are consistent with the observed  $\kappa$  and  $Pr$ . The relationship among  $\kappa$ ,  $SN$ ,  $SP$  and  $Pr$  can be described mathematically, if we assume two conditionally independent raters with the same validity, by:

$$\kappa = (Pr \times (SP - 1 + SN)^2) \times (Pr - 1) / ((Pr \times SN - SP - Pr + Pr \times SP) \times (Pr \times SN + 1 - SP - Pr + Pr \times SP)) \quad [\text{Eq. 1.}]$$

We assume that exposure classification by experts is better than chance, as expressed by:

$$SN + SP > 1 \quad [\text{Eq.2}]$$

We first define the distributions of the lower ( $\kappa_l$ ) and upper ( $\kappa_h$ ) bounds of  $\kappa$  by using uniform distributions ( $U$ ) as  $\kappa_l \sim U(a_1, a_2)$  and  $\kappa_h \sim U(b_1, b_2)$ . We further define the distribution of  $Pr$  as Beta distribution:  $Pr \sim \text{Beta}(c, d)$ . Information required to specify these distributions with reasonable credibility is available in reports evaluating inter-rater agreements, as in [1]. We can then calculate (multiple) lower bounds of  $SN$  and  $SP$  ( $SN_l$  and  $SP_l$ ) that are consistent with these distributions, following:

$$SN_l = \kappa_l / ((1 - Pr) + \kappa_l \times Pr), \text{ and} \quad [\text{Eq.3}]$$

$$SP_l = \kappa_l / (Pr + \kappa_l \times (1 - Pr)) \quad [\text{Eq.4}]$$

1  
2  
3 The upper theoretical bounds on  $SN$  and  $SP$  are known (i.e. these are 1) and, even though no other  
4 information is available, this enables us to sample plausible  $SN$  and  $SP$  values from the uniform  
5 distribution constrained by the lower bounds ( $SN_l$  and  $SP_l$ , respectively) and the upper bound of 1. Using  
6 Monte Carlo sampling this procedure is repeated multiple times to generate sets of possible ( $SN$ ,  $SP$ )  
7 combinations.  
8  
9

10 The proposed procedure is a hierarchical process that starts with [a] selecting a set of ( $\kappa_i$ ,  $Pr$ ) values from  
11 specified distributions to calculate ( $SN_l$ ,  $SP_l$ ) (Eq. 3 and 4), and is followed by [b] selecting candidate set  
12 ( $SN$ ,  $SP$ ) from values uniformly distributed between lower bounds, ( $SN_l$ ,  $SP_l$ ), and upper theoretical  
13 maximum of 1, and completed by [c] imposing constraints on the candidate set of ( $SN$ ,  $SP$ ) that are  
14 implied by Eq. 1 and 2 (see next paragraph for details of the last step). The purpose of step [a] in the  
15 procedure is to calculate lower bounds on sensitivity and specificity. The purpose of step [b] is to sample  
16 candidate values of sensitivity and specificity that lie between their respective theoretical lower and upper  
17 boundaries. The purpose of step [c] is to limit the sets of values of sensitivity and specificity selected in  
18 step [b] to only those that, first, are congruent with the theoretical model that relates validity to reliability  
19 (Eq. 1), and, second, satisfy the assumption that classification of exposure is better than random (Eq. 2).  
20  
21  
22  
23

24 By chance, some values of  $Pr$ ,  $SN$  and  $SP$  selected in this way will correspond to values of  $\kappa$ , implied by  
25 by Eq. 1, that lie outside of bounds on  $\kappa$  that we have specified by choosing specific values of  $\kappa_l$  and  
26 upper  $\kappa_h$  from corresponding distributions. Furthermore, some combinations of  $SN$  and  $SP$  will not be  
27 consistent with Eq. 2 (i.e. imply that exposure classification was worse than chance). Consequently, the  
28 candidate sets of values of  $SN$  and  $SP$  that are not in agreement with our starting assumptions are  
29 eliminated from the sample used to estimate distributions of  $SN$  and  $SP$ . The resulting combinations are  
30 consistent with our knowledge of agreement between different exposure assessment methods and foretell  
31 how valid these exposure assessment methods can be expected to be in general.  
32  
33

34 Calculation can be implemented in *R* and is available in *eAppendix* with input values specific to the  
35 illustrative example described below. There is no additional data to share.  
36

37 Because this research did not involve human subjects, ethics clearance was not required.  
38

39 This research was author-initiated and unfunded.  
40  
41

## 42 **Results**

43  
44 We apply our method to information provided in Table 2 in the article by Offermans et al. [1] for PAH  
45 exposure assessment. First, we define the distributions of the lower ( $\kappa_l$ ) and upper ( $\kappa_h$ ) bounds of  $\kappa$  for  
46 PAH by using uniform distributions ( $U$ ) as  $\kappa_l \sim U(0.29, 0.31)$  and  $\kappa_h \sim U(0.59, 0.61)$ . Some degree of  
47 judgments is involved in this but our formulation reflects the observation that in this case  $\kappa$  for PAHs lies  
48 between 0.3 and 0.6. We further define the distribution of  $Pr$  (mode of 5%, with 95% certainty that  $Pr$   
49 does not exceed 10%) as  $Pr \sim \text{Beta}(6.2, 99.7)[5]$ . The results of the rest of the calculations are summarized  
50 in the Figure, derived from 10,000 Monte Carlo samples for candidate values of  $SN$  and  $SP$  (step [b]  
51 above). They reveal that the mean  $SN$  for this example is about 0.78 (standard deviation (sd) 0.15) and  
52 mean  $SP$  is about 0.96 (sd 0.03).  
53  
54  
55

## 56 **Discussion**

57  
58  
59  
60

1  
2  
3 Our approach allows investigators to evaluate how good their exposure assessment methods truly are, not  
4 just how well they agree with each other, and should lead to incorporation of information of validity of  
5 expert assessment methods into formal uncertainty analyses in epidemiology (e.g. [6]). Specifically, once  
6 we can represent knowledge about *SN* and *SP* by a joint distribution, we can use a number of existing  
7 techniques to evaluate impact of exposure misclassification on epidemiologic results and to correct such  
8 results for known imperfections in exposure classification. Till now, knowledge of  $\kappa$  and exposure  
9 prevalence did not enable such analyses. It is noteworthy that Bayesian analyses that appraised *SN* and  
10 *SP* of another ~~JEM~~ [job-exposure matrix](#), produced very similar appraisal for *SP* and lower value for  
11 average *SN* with a similarly wide distribution [7, 8]. This perhaps points to commonality of quality of  
12 expert assessment methods used in occupational epidemiology. It is important to note that simple  
13 comparison of measures of agreement across studies and instruments is not helpful because values of  $\kappa$   
14 depend on the prevalence of exposure, which may differ between applications even for the same *SN* and  
15 *SP*. Our method has a distinct advantage for such comparisons and assessment of validity. With  
16 knowledge about validity, even if it is uncertain, we can begin the work on incorporating this knowledge  
17 [into routine](#) epidemiological analyses [9].  
18  
19  
20  
21  
22  
23  
24  
25  
26  
27  
28  
29  
30  
31  
32  
33  
34  
35  
36  
37  
38  
39  
40  
41  
42  
43  
44  
45  
46  
47  
48  
49  
50  
51  
52  
53  
54  
55  
56  
57  
58  
59  
60

1  
2  
3  
4  
5  
6  
7  
8  
9  
10  
11  
12  
13  
14  
15  
16  
17  
18  
19  
20  
21  
22  
23  
24  
25  
26  
27  
28  
29  
30  
31  
32  
33  
34  
35  
36  
37  
38  
39  
40  
41  
42  
43  
44  
45  
46  
47  
48  
49  
50  
51  
52  
53  
54  
55  
56  
57  
58  
59  
60

Figure: Plausible pairs of SN and SP values for PAH-exposure assessment methods for polycyclic aromatic hydrocarbons evaluated in [1]; hashed lined denote means

For peer review only

## Reference List

- 1 Offermans NS, Vermeulen R, Burdorf A, *et al.* Comparison of expert and job-exposure matrix-based retrospective exposure assessment of occupational carcinogens in The Netherlands Cohort Study. *Occup Environ Med* 2012;**69** (10):745-51.
- 2 Teschke K, Olshan AF, Daniels JL, *et al.* Occupational exposure assessment in case-control studies: opportunities for improvement. *Occup Environ Med* 2002;**59** (9):575-93.
- 3 White E, Armstrong BK, Saracci R. *Principles of exposure measurement in epidemiology: collecting, evaluating and improving measures of disease risk factor.* Oxford University Press 2008.
- 4 Feuerman M, Miller AR. Relationships between statistical measures of agreement: sensitivity, specificity and kappa. *J Eval Clin Pract* 2008;**14** (5):930-3.
- 5 Chun-Lung Su. *Bayesian Epidemiologic Screening Techniques.* 2013.
- 6 MacLehose RF, Gustafson P. Is probabilistic bias analysis approximately Bayesian? *Epidemiology* 2012;**23** (1):151-8.
- 7 Liu J, Gustafson P, Cherry N, *et al.* Bayesian analysis of a matched case-control study with expert prior information on both the misclassification of exposure and the exposure-disease association. *Stat Med* 2009;**28** (27):3411-23.
- 8 Beach J, Burstyn I, Cherry N. Estimating the extent and distribution of new-onset adult asthma in British Columbia using frequentist and Bayesian approaches. *Ann Occup Hyg* 2012;**56** (6):719-27.
- 9 Gustafson P. *Measurement Error and Misclassification in Statistics and Epidemiology.* Chapman & Hall/CRC Press 2004.
